# Supplementary material for: Homoplasy in the evolution of modern human-like joint proportions in Australopithecus afarensis
Source: eLife. 2021 May 12;10:e65897. doi: 10.7554/eLife.65897 (PMC8116054; doi:10.7554/eLife.65897)
Supplement: Figure 2—source data 1. [file elife-65897-fig2-data2.xlsx]

## Sheet: Sheet1
Species	Glenoid (GM)	Hum Head (GM)	Biepicondylar	Olecranon width	Radial head	Femoral head SI	Subtroch (GM)	Acetabulum SI	Talar ML	MT III	Sacrum (GM)
Gorilla beringei beringei	32.525	46.9271	71.31	.	27.04	.	.	.	17.64	.	.
Gorilla beringei beringei	34.5042	47.3061	77.58	29.21	25.01	39.92	32.1692	45.53	17.5	.	.
Gorilla beringei beringei	32.9019	44.7286	79.1	29	27.27	.	.	.	.	.	.
Gorilla beringei beringei	28.9189	.	.	.	.	37.93	29.4475	42.59	.	.	.
Gorilla beringei beringei	38.8514	54.9913	87.43	.	31.04	45.44	38.3183	50.71	.	.	.
Gorilla beringei beringei	32.2827	42.9515	73.58	25.49	26.1	37.85	33.6371	43.62	.	.	32.9269
Gorilla beringei beringei	43.7468	55.9066	96.16	37.56	33.88	51.68	40.0175	55.61	20.61	18.24	44.369
Gorilla beringei beringei	37.9741	56.9558	84.21	34.5	31.19	46.2	37.9644	52.15	.	.	39.8919
Gorilla beringei beringei	38.7176	59.425	92.09	33.18	34.35	52.06	40.7847	55.31	.	.	.
Gorilla beringei beringei	38.2914	.	94.78	31.21	35.19	51.59	39.7884	56.47	.	.	46.2276
Gorilla beringei beringei	32.6315	.	.	.	.	.	.	44.04	.	.	36.432
Gorilla beringei beringei	.	54.7622	93.58	.	.	50.3	38.7749	.	.	.	.
Gorilla beringei beringei	41.0587	58.291	100.34	37.66	31.87	48.11	37.3847	51.91	.	.	41.4799
Gorilla beringei beringei	42.4438	57.2615	100.88	35.61	33.8	40.31	34.61	.	.	.	.
Gorilla beringei beringei	.	49.3557	96.67	.	.	45.89	36.9996	57.18	.	18.12	.
Gorilla beringei beringei	35.1043	48.5493	83.52	29.4	26.22	40.58	32.5985	48.01	18.2	14.565	36.079
Gorilla beringei beringei	37.5265	51.8046	84.9	37.56	28.42	43.3	34.47	46.04	.	.	41.4125
Gorilla beringei beringei	33.5437	43.322	81.2	24.7	.	37.4	30.1101	.	17.9	13.95	.
Gorilla beringei beringei	35.51	47.5857	82.1	30.8	.	40.6	31.8998	45.6	18.6	14.65	34.1732
Gorilla beringei beringei	34.3154	48.3502	.	.	.	40.61	.	43.47	31.81	15.555	.
Gorilla beringei beringei	32.2367	46.6398	.	.	.	40.41	.	45.82	.	14.36	31.5451
Gorilla beringei beringei	33.513	46.5328	.	.	.	39.23	.	45.05	29.1	15.595	34.6043
Gorilla beringei beringei	41.678	59.2749	98.22	35.58	36.69	47.6	37.7952	56.51	20.6	16.55	46.0791
Gorilla beringei beringei	46.8769	63.8247	104.49	37.7	35.19	51.3	38.8547	60.31	21.8	19.4	46.7319
Gorilla beringei beringei	42.4782	59.3026	97.4	39.2	36.1	50	39.968	53.6	19	17.4	44.4931
Gorilla beringei beringei	40.6679	59.6771	92.5	36.5	34.9	49.5	41.1902	53.1	20.9	19.85	46.3362
Gorilla beringei beringei	43.5207	61.4059	105.6	42	37.6	53.8	42.4735	58	25.8	20.2	46.1493
Gorilla beringei beringei	39.2508	54.5692	.	.	.	48.57	.	56.6	34.02	16.81	34.115
Gorilla beringei beringei	40.9312	60.5681	.	.	.	54.65	.	.	38.27	19.13	.
Gorilla beringei graueri	49.7269	68.3775	109.09	34.81	37.51	58.09	50.3594	39.68	23.7	19.185	45.6937
Gorilla beringei graueri	51.2674	70.1437	118.84	48.77	40	61.12	43.6414	73.5	27.4	20.215	49.881
Gorilla beringei graueri	32.7292	48.2212	.	.	.	40.68	.	47.39	25.66	14.445	32.9188
Gorilla beringei graueri	.	48.5228	.	.	.	42.07	.	46.4	26.35	14.14	.
Gorilla beringei graueri	33.7099	49.099	.	.	.	40.62	.	46.56	26.43	14.9	31.3742
Gorilla beringei graueri	.	48.4781	.	.	.	39.95	.	.	26.87	14.315	.
Gorilla beringei graueri	29.2147	44.3787	.	.	.	38	.	47	27.07	.	30.8498
Gorilla beringei graueri	33.2365	49.417	.	.	.	42.63	.	47.88	27.14	15.34	34.3808
Gorilla beringei graueri	32.7833	47.2663	.	.	.	41	.	47.22	28.06	14.44	30.9541
Gorilla beringei graueri	34.7974	49.5723	.	.	.	43.68	.	46.57	31.03	14.945	32.2141
Gorilla beringei graueri	42.5027	66.2288	115.22	38.74	38.63	57.13	39.9348	63.6	24.35	18.62	43.519
Gorilla beringei graueri	43.1055	64.3466	102.3	31.4	35.5	53.1	40.1462	58.5	25.2	16.85	44.883
Gorilla beringei graueri	39.7109	55.6959	.	.	.	53	.	59.6	27.56	17.735	40.2199
Gorilla beringei graueri	.	56.3384	.	.	.	46.57	.	.	18.8	17.195	.
Gorilla beringei graueri	.	56.6828	.	.	.	46.9	.	.	19.8	18.055	.
Gorilla beringei graueri	40.7849	59.7546	.	.	.	51.4	.	58.2	30.58	16.35	38.7931
Gorilla beringei graueri	43.5719	54.9904	.	.	.	50.15	.	55.6	32.79	18.38	39.0343
Gorilla beringei graueri	39.8961	59.7932	.	.	.	51.76	.	56.75	33.63	17.265	42.316
Gorilla beringei graueri	41.8584	61.0008	.	.	.	54.95	.	56.93	33.91	17.575	37.6791
Gorilla beringei graueri	39.5197	62.1487	.	.	.	53.8	.	.	37.57	.	41.2217
Gorilla beringei graueri	42.3616	62.3479	.	.	.	50.4	.	56.68	37.71	18.185	44.0235
Gorilla beringei graueri	46.2752	63.0626	.	.	.	59.43	.	67.38	37.87	18.535	42.4556
Gorilla beringei graueri	41.2373	63.0179	.	.	.	53.37	.	59.38	38.15	17.685	.
Gorilla beringei graueri	42.8382	63.4578	.	.	.	52.66	.	63.8	.	.	39.0937
Gorilla beringei graueri	39.3834	59.1814	.	.	.	52	.	59	.	.	42.7287
Gorilla beringei graueri	.	.	112.2	41.4	38	56.1	42.9802	.	28.5	19.2	.
Gorilla gorilla	40.1906	55.0719	97.39	25.99	31.07	48.25	34.9005	54	27	21.035	41.3451
Gorilla gorilla	43.4575	59.7652	106.67	32.51	33.76	52.2	34.7234	56.3	32.24	21.09	41.0847
Gorilla gorilla	42.4294	59.1283	97.38	39.14	34.88	52.1	38.523	57.75	31.23	19.86	34.7883
Gorilla gorilla	41.584	55.8857	97.41	38.14	30.18	48.44	32.668	.	26.52	19.39	43.5788
Gorilla gorilla	31.7289	48.0297	74.47	23.1	26.82	40.3	27.9864	44.5	21.49	15.6	29.6622
Gorilla gorilla	42.7925	59.7591	115.1	35.06	33.94	53.23	42.6868	58.9	30.4	22.275	42.93
Gorilla gorilla	32.8229	46.0375	77.21	27.21	24.68	39.7	26.6165	46.32	21.22	15.78	31.7046
Gorilla gorilla	32.7914	43.8524	80.22	24.1	27.44	40.37	30.9084	46.5	23.89	17.955	33.5949
Gorilla gorilla	39.1704	59.9184	109.57	32.89	34.3	49.7	36.6196	55.07	29.46	22.165	42.9487
Gorilla gorilla	31.9283	46.6511	77.35	25.04	24.89	40.22	28.6201	46	21.86	15.935	29.256
Gorilla gorilla	35.1343	46.644	77.15	30.22	25.72	39	29.638	44.7	20.85	16.69	29.8658
Gorilla gorilla	30.9474	45.3657	79.31	.	28.2	38.42	29.1419	43.2	21.59	16.01	31.0759
Gorilla gorilla	44.7694	61.4174	109.02	36.93	36.73	49	39.4308	55.13	29.14	20.48	43.2711
Gorilla gorilla	45.1749	61.8165	102.1	39.31	33.89	51.33	36.2737	58.3	28.65	22.005	41.773
Gorilla gorilla	45.7148	63.1831	99.12	41.87	36.62	55.26	37.8026	62.8	32.6	21.435	47.9358
Gorilla gorilla	39.6383	58.2023	98.58	36.22	32.71	50.15	34.2968	57	28.44	21.25	41.608
Gorilla gorilla	31.8381	45.7506	72.26	25.64	26.74	39.9	29.2347	45.8	22.73	16.74	32.1537
Gorilla gorilla	33.6749	45.7408	80.85	28.42	28.3	41.37	26.969	47.38	23.27	16.765	31.4494
Gorilla gorilla	30.4875	46.4404	83.44	23.08	26.58	38.81	26.5209	44.83	20.42	14.85	33.282
Gorilla gorilla	44.5285	62.6151	110.07	33.85	38.82	53.66	37.0558	61.8	27.3	19.76	45.3146
Gorilla gorilla	31.8127	44.7151	71.37	25.1	25.58	39	27.511	44.76	24.13	17.615	30.7246
Gorilla gorilla	32.0686	.	.	.	.	40.41	.	44.41	23.67	15.78	34.3865
Gorilla gorilla	44.0365	61.5622	.	.	.	49.4	.	58.6	27.5	21.485	45.223
Gorilla gorilla	39.0272	60.6231	.	.	.	50.91	.	55.62	27.6	21.655	.
Gorilla gorilla	.	50.4873	.	.	.	42.97	.	.	20.96	19.615	.
Gorilla gorilla	36.7861	52.5486	90.2	30.67	31.76	45.41	34.0865	51.59	20.69	18.44	33.2891
Gorilla gorilla	31.0615	41.7659	70.05	23.95	24.88	36.32	30.129	41.82	16.2	14.98	25.0688
Gorilla gorilla	37.8001	53.5396	92.21	33.04	30.96	48.87	35.929	54.1	26	14.43	29.2755
Gorilla gorilla	39.694	48.967	97.59	30.8	30.41	47.54	34.3314	52.12	.	.	.
Gorilla gorilla	48.674	63.7288	102.45	40.99	37.86	51.39	39.9322	59.1	23.39	21.25	43.0069
Gorilla gorilla	27.496	40.6838	68.48	22.97	24.97	35.92	28.4548	36.92	17.09	14.745	.
Gorilla gorilla	39.0832	54.4228	99.21	31.53	32.32	47.37	35.9797	54.59	22.21	19.635	29.7909
Gorilla gorilla	38.9787	54.4158	95.83	35.82	32.88	49.48	35.5528	55.74	23.96	19.97	36.4318
Gorilla gorilla	36.0076	50.5805	89.85	34.17	29.42	42.75	31.3242	48.89	21.32	16.525	34.8684
Gorilla gorilla	33.2949	50.3386	88.83	28.98	30.76	44.53	29.9255	53.88	22.49	15.805	37.8939
Gorilla gorilla	45.8386	61.1828	112.42	40.16	33.73	51.88	40.6841	61.46	.	20.56	42.8073
Gorilla gorilla	41.1739	57.3807	.	.	.	47.6	.	54.35	36.33	19.4	37.1809
Gorilla gorilla	32.3298	46.1545	.	.	.	39.6	.	46.7	32.35	16.625	30.1022
Gorilla gorilla gorilla	41.407	57.6601	98.11	32.1	31.56	47.2	35.2994	55.03	22	20.7	36.5083
Gorilla gorilla gorilla	41.1494	61.212	102.63	39.58	36.14	52.3	34.96	70.62	28.86	.	36.091
Gorilla gorilla gorilla	32.3013	43.2963	74.02	27.04	23.46	38.2	28.6118	46.75	16.3	14.35	28.6742
Gorilla gorilla gorilla	36.3457	49.7045	81.35	31.7	28.4	44.7	33.421	49.9	17	16.55	31.9184
Gorilla gorilla gorilla	37.045	51.5962	78	27.5	27.3	41	32.0144	47.36	18.3	.	35.9746
Gorilla gorilla gorilla	39.4745	50.4627	80.8	30	28.1	41.7	33.5151	51.99	21.4	17.1	33.9299
Gorilla gorilla gorilla	40.1706	52.8819	93.7	34.2	31	45.3	35.2858	54.85	.	.	.
Gorilla gorilla gorilla	38.2406	50.1396	86.2	33.3	27.5	40.5	33.2524	52.61	.	.	36.6889
Gorilla gorilla gorilla	33.1778	45.2996	76.4	28.85	27.07	42.3	30.0874	47.03	17.54	16.35	.
Gorilla gorilla gorilla	34.1656	46.9991	84.54	26.73	25.72	38.5	34.2397	47.56	18.44	16.85	34.8046
Gorilla gorilla gorilla	32.3098	45.9555	77.965	28.63	26.395	38.1267	29.538	45.74	18.8	16.3775	31.233
Gorilla gorilla gorilla	32.9666	47.3441	75.3	26	26.8	38.1	29.3471	46.9	19.4	14.8	28.8453
Gorilla gorilla gorilla	36.8153	49.7361	77.72	30.47	29.41	42.2	32.2441	49.98	19.7	17.25	30.9652
Gorilla gorilla gorilla	38.6472	46.4101	78.185	25.385	27.155	38.86	32.1241	43.6	20.39	17.085	28.09
Gorilla gorilla gorilla	32.7027	45.4204	75	23.3	24.9	37.8	29.3319	45.43	17.6	14.45	30.9451
Gorilla gorilla gorilla	.	.	.	.	.	.	.	.	19.86	.	28.9344
Gorilla gorilla gorilla	43.887	62.6081	104.2	38	33.4	47.9	37.2411	57.81	16.6	20.7	36.9401
Gorilla gorilla gorilla	45.3634	59.1664	101.1	35.7	33.9	47.9	37.5553	57.81	16.7	18.95	36.8296
Gorilla gorilla gorilla	45.4147	60.3226	95.14	35.4	34.2	49.6	38.2262	58.23	20.9	18.65	41.4044
Gorilla gorilla gorilla	46.1606	61.4133	95.2	35.1	35.7	49.5	36.8944	60.95	22.5	.	39.865
Gorilla gorilla gorilla	45.8328	60.606	98.2	36.2	31.5	48.1	38.587	55.39	23.2	20.35	39.7049
Gorilla gorilla gorilla	44.7632	63.0819	100.8	36.9	34	50.5	42.4544	59.56	23.6	20.05	43.908
Gorilla gorilla gorilla	44.4743	60.4808	104.27	37.9	34	49.7	37.1726	61.78	24.2	20.85	.
Gorilla gorilla gorilla	44.4909	57.6489	99.8	36.5	33.7	43.8	37.538	54.38	.	.	39.5693
Gorilla gorilla gorilla	45.0033	63.914	104.5	40.5	36.5	50.2	41.1137	61.08	.	.	40.624
Gorilla gorilla gorilla	42.989	58.9382	101.84	36.79	33.88	50.8	39.0553	53.76	22.62	20.75	.
Gorilla gorilla gorilla	45.9081	59.8569	106.7	33.77	35.76	50.3	39.4634	56.44	24.28	20.05	37.2703
Gorilla gorilla gorilla	46.6962	66.912	109.63	40.32	38.53	52.5	42.0167	59.7	26.37	22.75	44.3494
Gorilla gorilla gorilla	46.8147	67.8251	108.79	41.09	37.21	51.6	38.8059	57.04	28.37	19.9	35.7211
Gorilla gorilla gorilla	47.5116	66.5845	109.11	40.93	36.75	54.8	42.3717	66.09	30.98	21.2	37.1421
Gorilla gorilla gorilla	46.6535	62.2056	111.87	43	33.75	51	39.1299	56.92	.	19.775	44.328
Gorilla gorilla gorilla	51.0323	72.4894	114.55	39.86	42.03	58.24	50.2526	61.85	33.41	25.255	50.1511
Gorilla gorilla gorilla	.	.	.	.	.	.	.	.	22.5	.	.
Gorilla gorilla gorilla	43.5569	59.2832	101.6	37	33.4	47.3	37.5116	53.8	24.5	21.3	39.2507
Gorilla gorilla gorilla	40.1036	49.1434	77.4	29.1	30.6	40.9	33.6416	51.04	16.6	18.1	36.3818
Gorilla gorilla gorilla	47.6749	63.9911	104.6	40.4	37	51.6	37.3866	62.69	24	20.9	41.1254
Gorilla gorilla gorilla	.	.	.	.	25.6	.	.	.	28.3	18.85	.
Gorilla gorilla gorilla	.	.	90.4	35.9	31.5	49.2	36.775	.	.	.	.
Homo sapiens	30.8791	43.3253	58.68	22.47	20.06	46.34	29.5825	55.97	26	18.315	37.4537
Homo sapiens	25.279	37.2892	53.15	.	.	40.55	29.0861	45.6	26.95	16.08	33.3717
Homo sapiens	30.1251	45.6076	63.61	22.93	23.92	48.88	30.3519	52.64	30.02	16.395	40.4476
Homo sapiens	31.3615	46.517	61.74	22.99	26.18	50.62	27.3743	55.2	31.26	17.125	40.3344
Homo sapiens	29.1111	40.9487	60.13	19.9	22.32	42.8	26.9777	46.41	27.96	16.275	35.5291
Homo sapiens	28.515	40.8412	52.58	18.17	20.99	40.18	29.2634	46.8	27.55	15.915	36.2103
Homo sapiens	29.6521	46.0617	62.53	25.27	24.34	47.99	29.9099	54.78	29.73	17.74	40.3705
Homo sapiens	30.8517	45.4467	62.24	23.23	22.55	47.43	31.1463	54.46	29.97	17.83	44.0468
Homo sapiens	27.0881	42.644	54.78	21.28	21.83	42.25	26.0502	47.65	25.59	16.4	34.8162
Homo sapiens	30.7289	46.6747	64.44	24.07	25.23	49.82	30.4891	56.15	30.17	17.775	42.6137
Homo sapiens	30.1616	47.0771	62.81	22.43	24.35	48.08	29.0692	52.4	31.34	16.79	39.7959
Homo sapiens	31.3421	42.7998	60.6	26.1	22.4	43.4	26.395	49.2	26.49	16.045	36.6829
Homo sapiens	24.5448	35.0483	50.72	17.66	17.61	39.5	24.8499	44.55	23.93	15.57	35.2747
Homo sapiens	31.0768	44.8272	61.44	25.74	22.16	48.67	32.5727	55.3	30.03	16.785	40.8633
Homo sapiens	31.4433	41.3974	60.26	21.65	20.33	43.55	30.6156	49.9	29.1	18.015	38.5057
Homo sapiens	27.5246	36.9388	52.27	18.61	19.62	40.5	27.996	48.4	26.31	15.76	38.9844
Homo sapiens	32.462	46.0951	64.83	23.54	24.16	48.65	32.5592	54.16	29.89	18.21	42.2352
Homo sapiens	31.1377	46.0408	65.37	24.45	23.66	48.82	30.008	55.86	28	17.025	43.025
Homo sapiens	28.753	41.1504	53.62	20.22	20.81	45.53	27.918	50.85	27	17.78	34.6813
Homo sapiens	31.6341	46.4478	59.35	23.37	22.5	47.56	30.3248	53.65	27.34	18.645	41.6357
Homo sapiens	26.6288	37.9286	55.85	19.58	19.79	42.2	27.2197	50.27	26.89	14.97	34.7756
Homo sapiens	28.3577	39.539	59.11	22.84	20.55	43.3	28.335	49.1	27.16	16.095	37.3777
Homo sapiens	27.5597	40.3943	53.23	20.92	21.16	43.7	27.6293	50.3	28.41	16.365	35.2891
Homo sapiens	26.8341	37.6846	52.79	21.06	19.04	41.5	29.5244	47.1	25.16	15.79	37.4481
Homo sapiens	29.9535	44.7442	64.51	23.79	25.43	47.57	29.8181	53.44	28.98	17.645	37.516
Homo sapiens	30.5824	46.8417	64.11	21.77	23.24	45.24	29.0726	51	30	19.78	37.685
Homo sapiens	28.1977	39.3464	59.16	19.7	19.51	42.66	27.5467	48.55	25.12	17.355	35.9511
Homo sapiens	26.3003	41.3432	56.1	20.94	21.91	43.65	29.0867	49.8	29.07	17.48	35.8421
Homo sapiens	29.0474	43.3839	59.12	20.42	20.01	44.42	28.1374	52.8	27.17	17.41	35.6458
Homo sapiens	27.0787	41.3634	62.83	23.12	21.8	41.3	28.7874	47.78	28.7	16.795	36.1314
Homo sapiens	29.2008	40.7463	60.39	21.49	20.92	42.62	30.069	49.07	28.42	16.325	38.7073
Homo sapiens	23.8325	35.1229	48.48	18.21	18.92	37.42	24.1518	44	25.06	13.49	31.0248
Homo sapiens	32.9227	45.251	67.77	22.13	23.37	48.6	29.4068	50.8	27.69	18.38	39.278
Homo sapiens	25.5892	39.1853	53.11	19.86	20.23	41.75	25.837	50.6	28.58	15.425	36.0018
Homo sapiens	32.6442	45.7202	59.4	23.14	22.44	48.4	28.5767	55.8	30.67	18.005	43.071
Homo sapiens	26.7456	39.7637	56.06	19.73	19.95	41.26	28.8811	49.6	26.38	17.58	34.9287
Homo sapiens	25.8754	38.956	57.05	23.62	20.95	40.3	28.8388	48.86	24.89	16.005	34.4286
Homo sapiens	33.8013	48.2825	65.57	22.82	23.74	50.6	30.0416	56.1	29.3	19.08	45.5597
Homo sapiens	30.3239	45.2391	66.83	22.52	24.17	47	28.1188	53	31	18.755	39.2501
Homo sapiens	29.2096	42.5955	58.91	22.28	22.02	44.26	30.3999	49.1	29.36	15.64	39.7543
Homo sapiens	30.7667	45.4942	60.68	23.74	25.56	45.48	32.0224	51.98	29.44	19.2	36.7978
Homo sapiens	31.4186	46.8201	64.73	21.76	22.59	48.83	29.7679	53.7	28.74	15.94	38.6697
Homo sapiens	26.6292	39.1003	55.54	20.92	19.18	39.08	24.3272	49.07	.	16.705	33.0242
Homo sapiens	31.1356	42.3997	61.18	20.65	20.93	46.91	27.5102	55.14	.	15.145	38.2289
Homo sapiens	36.1239	43.1653	63.7	21.81	23.26	42.56	28.3424	50.84	.	17.115	37.7249
Homo sapiens	37.0024	41.9283	61.36	23.16	22.84	40.87	27.7475	52.66	.	16.915	36.7551
Homo sapiens	32.5736	43.603	57.45	21.96	21.99	48.16	34.5024	59.82	.	17.805	41.5075
Homo sapiens	32.2065	44.1981	58.27	20.51	20.42	43.18	28.4584	53.27	.	15.62	37.1416
Homo sapiens	27.2821	40.3616	59.63	20.42	18.68	42.26	26.1891	50.76	.	.	37.5633
Homo sapiens	30.194	42.4745	63.97	22.79	21.79	42.59	27.2534	51.4	.	18.93	36.6435
Homo sapiens	25.6457	35.6676	49.04	20.34	17.47	40.07	25.4438	50.32	.	18.13	36.0579
Homo sapiens	26.0812	36.0703	54.36	19.43	17.67	40.04	25.839	49.7	.	16.105	40.3641
Homo sapiens	26.7746	36.7721	.	.	.	39.7	.	46.12	26.4	15.915	39.7782
Homo sapiens	30.7708	46.4316	.	.	.	47	.	53	30.67	17.25	41.1784
Homo sapiens	30.9008	44.8742	.	.	.	46.3	.	54.75	27.83	19.36	41.0462
Homo sapiens	32.1165	45.5916	.	.	.	50.3	.	57.32	30.82	19.085	42.87
Homo sapiens	29.8483	45.3536	.	.	.	45.96	.	53.83	31.65	19.005	41.0266
Homo sapiens	33.1653	46.9345	.	.	.	48.43	.	54.77	30.2	17.925	43.0607
Homo sapiens	28.0907	39.0542	.	.	.	41.27	.	43.3	24.5	16.025	41.5917
Homo sapiens	30.2103	43.0633	.	.	.	45.9	.	52.4	28.27	17.375	45.0884
Homo sapiens	27.1089	38.9123	.	.	.	39.6	.	46.2	25.23	16.065	38.2508
Homo sapiens	26.0038	35.9347	.	.	.	39.41	.	45.68	25	15.45	36.9757
Homo sapiens	31.2281	45.5743	.	.	.	49.3	.	55.48	29.55	.	42.865
Homo sapiens	26.2172	38.5413	.	.	.	41.08	.	48.08	26.65	15.97	40.7036
Homo sapiens	28.877	43.938	.	.	.	46.15	.	51.8	29.42	16.975	38.9343
Homo sapiens	32.3172	45.6995	.	.	.	48.31	.	53.6	31.93	19.8	41.8916
Homo sapiens	29.5044	42.008	.	.	.	45.05	.	50.4	27.35	17.025	37.056
Hoolock hoolock	15.5051	20.3775	27.5	12.53	13.36	16.73	12.4817	22.78	9.3	6.61	16.9926
Hoolock hoolock	.	18.8948	27.78	10.83	13.21	.	11.3486	21.41	.	.	16.9893
Hoolock hoolock	.	.	.	.	.	15.64	.	.	.	.	.
Hoolock hoolock	15.2607	19.2032	27.78	10.79	11.72	15.32	11.7504	20.93	.	.	20.74
Hoolock hoolock	.	18.8288	25.62	11.09	11.99	15.7	11.0692	21.62	8.35	.	15.1454
Hoolock hoolock	13.9292	.	.	.	12.02	15.67	10.8455	21.26	7.5	7.215	15.4678
Hoolock hoolock	.	17.9632	26.48	10.51	11.88	14.67	10.5514	19.92	7.4	7.49	14.7441
Hoolock hoolock	14.5381	18.8571	26.94	11.43	12.55	16.05	10.9952	21.99	8.1	7.23	14.3497
Hoolock hoolock leuconedys	14.5756	19.6192	28.06	12.42	13.41	16.32	10.8423	21.98	8.1	7.4	15.6319
Hoolock hoolock leuconedys	12.1135	16.7191	25.57	11.17	11.06	15.17	9.31987	19.84	.	.	14.2103
Hoolock hoolock leuconedys	.	19.2924	26.32	12.26	11.93	16.19	10.0199	20.79	7	6.93	17.0365
Hylobates agilis	12.0096	17.4571	26.73	12.1	13	15.24	9.24079	20.05	7.4	6.73	13.2262
Hylobates agilis	12.6555	17.163	26.44	11.99	11.58	15.16	9.07953	20.63	6.05	6.06	13.7713
Hylobates agilis	12.68	18.0799	26.71	11.56	12.45	15.47	10.9829	20.9	7.85	6.655	13.6416
Hylobates albibarbis	13.67	18.9017	25.93	10.38	11.45	15.16	10.7342	20.57	6.4	7.165	12.5397
Hylobates albibarbis	12.3544	17.2033	26.8	10.46	11.44	15.87	10.4612	21.44	7.2	7.04	.
Hylobates klossii	10.362	15.9061	24.17	9	11.57	15.75	10.5004	16.97	6.2	6.365	.
Hylobates klossii	11.9344	16.025	25.39	10.45	11.36	13.9	10.8505	18.19	6.95	7.205	.
Hylobates klossii	12.2863	15.7848	26.79	10.36	10.58	15.07	9.41273	20.16	6.45	7.615	13.2883
Hylobates klossii	11.1556	13.9456	25.34	10.15	9.5	12.95	9.08384	17.31	6.9	6.595	11.1371
Hylobates klossii	11.8433	17.1047	25.36	9.91	11.74	15.92	11.2714	20.97	7.8	6.78	13.8102
Hylobates klossii	10.5062	16.0896	25.41	9.68	12	15.2	10.5262	17.25	6.73	6.45	.
Hylobates lar	.	16.145	25.75	11.18	9.95	13.65	7.844	19.03	7	7.105	9.50999
Hylobates lar	13.563	18.2598	27.54	12.53	11.81	14.88	10.5096	21.22	5.2	6.35	14.2835
Hylobates lar	10.683	13.895	23.01	10.21	9.78	12.23	7.43742	15.54	6.1	6.205	9.90197
Hylobates lar	11.2765	14.7077	25.49	8.83	10.16	13.86	9.02	20.35	6.8	6.36	11.2838
Hylobates lar	12.8432	18.564	29.75	9.7	13.41	16.65	11.5748	20.66	7.37	6.915	14.7545
Hylobates lar	12.8335	19.666	27.32	11.01	13.32	.	.	20.2	6.88	.	12.2044
Hylobates lar	12.7282	18.2794	27.7	9.01	13.02	16.76	10.0552	19.33	7.69	7.17	13.5128
Hylobates lar	12.1836	17.2035	25.09	8.53	11.6	15.17	9.82895	18.75	7	6.715	12.6854
Hylobates lar	12.37	18.569	32.12	10.26	13.68	16.77	10.2289	21.69	6.79	7.555	14.3763
Hylobates lar	11.4889	17.5476	27.23	10.34	12.62	15.44	10.0149	19.13	6.41	.	12.89
Hylobates lar	13.2841	18.0227	27.01	9.64	12.33	15.78	10.8964	20.09	7.2	6.24	13.7152
Hylobates lar	11.7293	17.6171	27.88	9.34	12.11	15.8	10.1657	18.86	6.19	6.735	13.2766
Hylobates lar	10.7222	16.1292	24.6	8.68	11.88	14.4	9.51485	17.56	6.4	6.06	11.567
Hylobates lar	14.0654	20.3755	27.01	11.11	13.23	16.99	14.2232	9.02	.	6.415	.
Hylobates lar	12.3683	16.7899	27.41	11.32	11.1	14.8	9.94328	20.47	.	.	13.9921
Hylobates lar	13.2888	18.0541	29.09	10.69	12.52	15.21	10.1109	20.51	.	7.13	13.8217
Hylobates lar	13.0348	19.1164	27.64	10.92	12.72	15.7	10.9775	20.53	.	7.12	13.9773
Hylobates lar	10.5497	15.6749	21.89	8.65	9.56	13.7	9.30561	18.93	.	6.075	11.8617
Hylobates moloch	.	.	.	.	13.49	.	.	.	8.6	7.445	.
Hylobates moloch	11.5465	15.2146	25.21	8.34	10.77	13.33	8.19756	16.36	7.5	.	15.81
Hylobates moloch	12.0666	18.1256	29.1	9.18	13.3	15.78	11.0845	19.3	7.13	7.19	13.6172
Hylobates moloch	12.9572	17.9446	29.25	10	12.48	16.8	10.6835	19.42	7.31	6.835	.
Hylobates mulleri	11.8558	16.37	24.05	10.19	12.14	15.33	10.7134	17.75	6.33	6.32	12.5675
Hylobates mulleri	12.8149	16.0877	24.56	10.39	11.18	15.36	10.1855	17.71	6.61	.	14.2809
Hylobates mulleri	10.7791	16.6291	23.08	9.05	10.6	14.54	10.0857	16.31	7.36	5.6	14.0193
Hylobates mulleri	12.9172	17.0001	26.67	9.98	12.49	16.42	10.8634	18.76	7.43	6.41	12.4608
Hylobates mulleri	11.1977	17.2631	25.64	9.11	13.07	16.32	10.8074	17.91	7.85	6.77	13.9001
Hylobates mulleri	13.2576	16.9042	28.42	10.38	12.21	16.7	12.4715	19.38	.	.	15.4774
Nomascus gabriellae	13.9714	18.2166	29.38	12.2	12.32	17.32	11.1834	22.25	8.3	6.66	16.3087
Nomascus gabriellae	12.9526	19.2997	27.33	12.77	12.18	15.52	10.5118	20.19	8.9	6.745	13.6864
Nomascus leucogenys	14.5687	19.5184	30.44	13.24	13.2	16.93	11.0793	19.88	8.35	.	.
Nomascus leucogenys	15.4038	20.5835	31.41	12.09	13.04	17.05	12.1578	22.76	8.8	7.32	14.4037
Nomascus leucogenys	13.092	18.1758	29.26	13.43	13.6	.	.	.	.	.	.
Pan paniscus	.	.	.	.	.	.	.	.	11.8	.	.
Pan paniscus	21.4294	30.035	45.9	14.8	19.7	26	19.7104	31.83	13.5	12.4	21.287
Pan paniscus	24.4914	33.8296	57.5	15.5	23.4	29.8	20.6	34.1	17.7	14.55	24.1373
Pan paniscus	23.4806	35.0719	55.89	18.94	22.46	29.87	21.8631	33.53	17.03	13.08	26.3381
Pan paniscus	25.1878	35.0479	65.22	22.41	24.08	33.55	24.7295	37.02	16.23	13.095	29.1573
Pan paniscus	23.7538	35.9562	.	.	.	30.38	.	35.49	25.1	15.035	25.4509
Pan paniscus	23.5153	34.3135	.	.	.	30.61	.	35.5	22.77	.	26.7126
Pan paniscus	24.2967	36.2239	.	.	.	30.37	.	34.3	22.65	12.94	24.0634
Pan paniscus	25.1811	34.497	.	.	.	29.98	.	37.52	.	.	23.5841
Pan paniscus	25.207	37.1232	.	.	.	32.81	.	35.65	22.44	12.65	25.9279
Pan paniscus	23.2353	32.8391	.	.	.	29.45	.	36	.	13.12	22.29
Pan paniscus	24.6447	36.9266	.	.	.	32.17	.	36.9	21.09	14.37	26.7394
Pan paniscus	23.3573	34.1969	.	.	.	30.24	.	34.73	25.52	14.365	22.1239
Pan paniscus	26.3319	37.0721	.	.	.	32.11	.	34.97	22.57	.	25.567
Pan paniscus	27.8884	37.6126	.	.	.	32.84	.	38.3	25.09	13.925	27.3526
Pan paniscus	25.0166	34.8957	.	.	.	30.17	.	33.84	26.55	14.725	27.4227
Pan paniscus	25.2656	36.2974	.	.	.	29.62	.	34.23	.	14.07	26.5628
Pan paniscus	26.9588	37.5838	.	.	.	30.71	.	35.63	20.92	14.865	24.204
Pan paniscus	26.8121	36.9419	.	.	.	34.18	.	40.42	20.37	16.145	26.3394
Pan paniscus	24.608	32.7266	.	.	.	27.79	.	31.54	19.01	13.32	22.4506
Pan paniscus	23.8214	35.035	.	.	.	30.4	.	35	.	15.01	.
Pan paniscus	22.3634	32.7165	.	.	.	30.3	.	32.8	25.94	14.52	22.3714
Pan paniscus	22.3378	31.9877	.	.	.	28.21	.	32.97	26.5	14.34	20.7594
Pan paniscus	24.0496	35.3843	.	.	.	30	.	33.7	16.63	.	26.9608
Pan paniscus	.	.	.	.	.	35.7	.	40.6	20.31	.	27.0689
Pan paniscus	.	.	.	.	.	31.25	.	33.63	16.19	.	25.4554
Pan troglodytes	.	.	.	.	.	36.7	.	.	.	15.45	.
Pan troglodytes	27.2554	36.8029	57.9	20.7	22.5	30.3	24.5231	37.81	15.7	14.9	27.061
Pan troglodytes	.	.	60.7	22.2	23.8	33.7	24.4869	.	.	15.2	.
Pan troglodytes	29.2548	40.6249	63.5	24.6	25.1	.	.	41.86	18.8	15.35	32.0458
Pan troglodytes	27.6568	38.641	59.1	24.4	23.1	32.4	25.1137	42.23	13.8	15.3	29.1649
Pan troglodytes	31.4093	40.9433	59.5	22.5	23.4	34.55	26.571	43.22	15	15.5	33.2649
Pan troglodytes	29.2544	42.6758	66	24.3	24	36.3	26.5827	44.32	.	.	29.5845
Pan troglodytes	28.5238	39.3495	61.7	24	23.8	32.1	25.2895	39.11	15.8	16.2	29.3918
Pan troglodytes	30.3409	44.3892	65.6	30.3	26.6	36.4	27.6463	45.57	15.9	15.75	31.2409
Pan troglodytes	30.6203	41.8691	60.1	21.2	26.5	34.55	27.1396	42.62	14.8	17.15	29.0978
Pan troglodytes	31.7003	41.6353	68.9	25.9	27.3	38.55	28.2899	46.44	17.7	17.75	32.6093
Pan troglodytes	29.9316	40.8347	65	23.6	25.5	31.1	25.5441	38.88	16.3	15.2	31.2146
Pan troglodytes	31.1562	42.0071	66.3	26.3	26	33	27.9675	43.55	15.7	16.15	35.1482
Pan troglodytes	32.6716	42.4052	73.5	23.8	24.2	33.4	27.5122	39.03	19.7	18.6	31.5521
Pan troglodytes	32.5314	43.6306	71.1	25.3	26.9	36.8	29.2246	46.43	19.8	7.75	28.3095
Pan troglodytes	26.0686	36.2152	59.1	20.4	23.2	31.6	25.4572	40.27	18.4	14.8	29.0035
Pan troglodytes	26.2199	35.61	55.7	17.3	20.6	31.15	24.5275	40.2	17.85	15.3	26.7373
Pan troglodytes	28.4397	38.9705	61.9	21.5	23.1	32.8	25.2357	42.04	18	16.55	27.5746
Pan troglodytes	33.171	44.8181	67.7	25.1	28	37.4	29.451	46.98	.	.	35.5752
Pan troglodytes	28.1429	41.6992	65.6	23.5	25.7	33.9	26.1845	39.98	15.9	17.3	30.3804
Pan troglodytes	26.5759	38.0587	60.2	20.4	23.5	32.8	26.8559	40.5	16	16.1	31.855
Pan troglodytes	26.3231	39.0471	62.4	24.3	24.2	33.05	24.6183	39.05	15.1	15.1	.
Pan troglodytes	28.9185	39.437	58.8	21.9	24.7	34.1	25.7806	41.88	17.55	15.4	29.0831
Pan troglodytes	27.7011	41.56	58.52	22	24.6	34.5	26.9496	40.74	18.4	16.8	27.9302
Pan troglodytes	30.8334	43.276	63	23.4	26.1	37.1	27.7139	46.03	18.8	15.65	31.8718
Pan troglodytes	27.6602	38.2545	59.78	21.9	25.8	33.15	26.2983	39.89	16.6	14.45	30.3857
Pan troglodytes	28.1461	42.4517	75.29	25.94	25.6	35.55	24.609	40.1	20.66	16.165	30.8426
Pan troglodytes	25.9274	37.6203	58.92	21.96	23.42	31.43	23.0274	36.42	18.78	13.49	27.326
Pan troglodytes	24.6334	41.3074	63.06	23.1	25.57	32.64	25.0385	35.65	19.29	16.08	38.01
Pan troglodytes	26.1839	37.8337	56.7	26.2	.	33.66	23.8075	38.22	18.61	14.475	28.2334
Pan troglodytes	26.9974	40.3648	66.67	24.14	23.27	35.56	26.9076	40.7	17.53	16.45	32.11
Pan troglodytes	30.2121	44.7804	68.85	25.56	26.75	36.44	26.3454	41	20.28	17.675	33.6068
Pan troglodytes	26.253	39.4881	59.74	19.38	24.39	33	23.7897	37.81	19.54	15.51	26.8999
Pan troglodytes	27.405	39.9295	67.38	21.57	26.14	34.33	26.6072	42.32	18.67	15.835	28.5026
Pan troglodytes	26.2544	40.4439	62.7	27.63	25.49	34.2	24.1902	38.66	22.67	15.335	30.6702
Pan troglodytes	25.6029	37.4203	60.54	22.98	22.91	30.9	23.3345	34.77	18.13	14.53	24.839
Pan troglodytes	25.6542	37.4742	57.16	21.66	22.79	31.61	20.6279	36.77	18.61	14.035	25.9062
Pan troglodytes	28.1429	41.395	62.39	21.3	24.26	34.5	24.2345	37.7	17.89	14.97	30.9455
Pan troglodytes	26.5215	39.1614	62.66	23.21	23.82	34.2	22.6185	40.9	20.07	.	30.1751
Pan troglodytes	23.3	34.8152	57.7	19.68	22.98	30.92	23.4408	35.56	17.08	14.895	25.8892
Pan troglodytes	26.1806	40.6438	66.2	20.78	25.07	35.56	25.7702	41.9	19.09	14.82	28.1585
Pan troglodytes	30.1535	41.8321	71.73	25.43	28.52	37.27	24.9092	42.22	20.23	16.32	32.9754
Pan troglodytes	25.5693	41.0022	60.53	21.95	24.25	33	24.4739	37.66	20.96	14.295	26.9722
Pan troglodytes	28.0817	40.6344	70.41	26.36	27.78	36.3	25.0183	41.05	18.76	15.525	30.1304
Pan troglodytes	24.728	38.772	67.04	22.88	24.86	33.92	24.3961	38.32	19.11	15.485	30.2265
Pan troglodytes	24.7794	34.7766	55.21	22.74	22.79	29.7	24.5899	35	16.61	13.775	27.8467
Pan troglodytes	26.6375	37.2773	56.11	19.78	24.21	32.68	22.0757	38.4	18.15	13.92	27.5457
Pan troglodytes	24.4823	37.525	60.59	21.49	22.12	33.13	24.788	37.56	19.84	15.94	28.6408
Pan troglodytes	28.1302	41.1233	68.01	24.47	26.38	36.84	25.7292	41.55	21.26	15.945	26.9511
Pan troglodytes	25.8478	41.5245	62.86	22.9	25.36	34.88	22.8713	38.9	20.17	14.925	30.2407
Pan troglodytes	27.8508	40.7767	69.44	23.89	26.4	36.78	24.875	42	20.38	15.495	31.3688
Pan troglodytes	25.878	38.0665	60.67	17.94	24.31	32.41	23.1403	38.89	.	.	27.2743
Pan troglodytes	26.7218	36.9139	58.63	23.58	24.61	30.8	27.1801	35.27	16.22	15.85	26.9196
Pan troglodytes	24.1883	34.9483	57.36	17.5	23.37	30.5	23.8395	.	14.4	14.45	23.4365
Pan troglodytes	25.0597	32.4297	57.93	19.99	23.06	28.6	22.02	36.61	14.91	14	.
Pan troglodytes	26.8194	39.8398	63.18	25.54	25.42	33.5	22.5965	38.29	17.78	15.45	25.3121
Pan troglodytes	26.7889	37.1697	66.51	22.02	24.99	32.5	25.2359	41.53	15.87	15.55	29.7391
Pan troglodytes	30.461	42.8636	69.74	23.93	27.97	37	26.392	42.63	16.28	17.5	31.4614
Pan troglodytes	26.1145	39.5882	68.44	22.27	25.57	34.6	26.6282	40.52	19.74	.	28.8056
Pan troglodytes	24.505	33.1261	59.43	19.84	22.25	30.1	23.6525	36.95	16.6	13.85	23.8865
Pan troglodytes	26.8814	37.6089	60.91	25.17	20.16	31.6	28.5342	36.82	.	.	25.6675
Pan troglodytes	27.0829	37.4478	58.98	20.4	22.74	35.5	26.8686	39.62	17.49	14.5	28.512
Pan troglodytes	25.2184	40.3651	54.99	21.9	25.68	30.8	25.2666	36.43	16.39	15.8	25.8474
Pan troglodytes	.	.	.	.	.	.	.	.	10.99	.	18.9481
Pan troglodytes	.	.	.	.	.	.	.	.	10.94	.	17.3069
Pan troglodytes	28.4827	42.0616	68.51	27.5	27.95	35.9	25.7461	39.89	15.85	17.05	29.5587
Pan troglodytes	.	.	.	.	.	32.52	25.7633	37.53	14.68	15.435	31.4799
Pan troglodytes	.	.	.	.	.	37.56	27.5252	43.22	25.58	18.12	33.188
Pan troglodytes	.	.	.	.	.	34.03	25.6094	39.12	16.46	15.85	.
Pan troglodytes	.	.	.	.	.	35.55	25.1277	39.56	16.51	16.07	.
Pan troglodytes	22.709	32.6656	53.2	18.2	21.4	28	21.1714	32.7	14.8	12.5	23.283
Pan troglodytes	24.9716	33.8545	57.14	20.58	22.76	30.42	22.1059	36.05	16.13	.	24.1617
Pan troglodytes	27.6424	41.7363	68.16	23.98	27.18	36.16	26.8771	42.25	19.47	16.845	.
Pan troglodytes	26.1638	40.5626	64.54	21.49	25.52	34.16	27.1642	41.23	23.22	14.825	29.5145
Pan troglodytes	27.907	42.1572	63.7	24.4	26.8	36.5	26.8214	41.9	17.5	16.05	25.1794
Pan troglodytes	24.4602	37.846	57.2	20.1	23.8	30.9	22.02	35.7	17	14.35	36.7
Pan troglodytes	26.9165	38.3425	59	21.1	23.7	31.8	24.6708	36.1	16.1	15.1	36.5
Pan troglodytes	24.4487	37.6887	58.7	19.3	23.7	32.6	23.0378	37.7	17	15.35	24.3031
Pan troglodytes	28.1405	39.6548	66.7	24.3	26.7	33.5	26.0906	38.2	18	16.25	35
Pan troglodytes	27.1278	39.9238	64.99	21.93	24.84	33.92	26.1958	38.6	18.98	15.735	.
Pan troglodytes	24.9946	35.4459	56.76	20.23	22.72	31.66	24.7089	36.82	14.79	14.25	.
Pan troglodytes	23.5424	34.0659	51.78	20.25	22.12	28.54	21.2	33.88	13.62	13.65	27.5868
Pan troglodytes	25.135	37.9681	59.94	18.86	24.01	31.81	24.7666	35.72	16.35	15.32	30.1125
Pan troglodytes	23.4658	36.9023	69.88	24.17	25.23	32.28	23.8888	37.96	16.13	.	29.3058
Pan troglodytes	23.678	36.1897	60.49	20.18	24.02	31.04	22.6095	35.99	15.35	14.95	.
Pan troglodytes	25.5093	37.4389	64.49	19.84	25.45	32.01	25.0544	37.1	16.84	14.71	.
Pan troglodytes	25.8298	35.9372	62.65	17.9	25.28	31.58	23.5333	.	14.62	.	.
Pan troglodytes	27.1777	37.8793	63.02	24.29	23.13	30.91	25.8254	.	.	14.505	.
Pan troglodytes	29.9347	41.567	80.49	31.19	24.66	36.36	28.4713	42.78	.	15.305	41.0427
Pan troglodytes	28.458	38.4124	62.15	24.58	23.13	32.37	25.7304	40.87	.	15.43	30.9196
Pan troglodytes	30.7577	37.7082	69.09	25.3	24.35	31.98	23.3475	38.96	.	16.8	32.0001
Pan troglodytes verus	25.5556	37.3529	59.9	22	24.3	30.95	22.8125	39.45	14.8	14.65	31.3893
Pan troglodytes verus	28.1578	38.4662	71.7	23.2	27.2	31.75	25.5687	39.54	15.7	16.05	29.8812
Pan troglodytes verus	26.5985	35.5848	59.1	21.1	23.8	30.66	24.46	37.9	15	14.49	28.8794
Pan troglodytes verus	27.7586	37.765	67.1	23.2	24.6	32.2	24.04	40.11	17.5	15.65	26.9443
Pan troglodytes verus	26.3875	37.0144	64	22.7	24.3	31.25	23.3602	39.86	17.1	14.95	29.4337
Pan troglodytes verus	26.2272	38.2417	59	22.9	24.1	31.95	25.0855	39.1	18.7	15.55	29.411
Pan troglodytes verus	24.6465	33.775	53.2	18.5	21.5	30.2	22.9574	39.29	14.4	14.9	27.4723
Pongo abelii	34.9278	51.2293	71.35	24.38	27.46	39.32	23.2538	48.56	22.01	16.445	33.7212
Pongo abelii	.	39.8498	66.8	22.1	22.5	34.5	21.9616	41.1	15.4	16.05	29.2711
Pongo abelii	30.9112	43.2674	69.42	23.4	26.13	37.15	21.6737	43.48	19.57	15.985	31.2195
Pongo abelii	29.7733	46.9757	69.29	25.7	23.89	35.19	21.9368	42.32	19.36	15.89	31.2892
Pongo abelii	28.2696	37.0958	61.63	20.83	20.64	30.66	19.2303	35.16	16.91	13.385	25.4631
Pongo abelii	25.7103	36.6689	56.26	18.5	21.06	31.32	18.9535	34.89	13.66	12.96	.
Pongo abelii	26.6351	36.5728	59.32	20.49	21.71	31.81	20.3052	35.07	15.77	12.74	21.808
Pongo abelii	24.1325	36.9453	56.15	21.48	21.83	28.94	17.0061	32.72	15.29	11.9	23.7456
Pongo abelii	25.7764	35.18	57.27	20.71	19.81	30.31	18.9445	35.73	15.3	12.81	25.815
Pongo abelii	29.0357	31.2981	57.96	17.24	18.57	25.89	16.9644	31.28	14.95	.	.
Pongo abelii	.	.	.	21.22	24.49	.	.	.	17.54	16.995	.
Pongo abelii	27.3179	38.1422	54.97	20.87	20.18	29.15	17.739	36.8	14.75	12.475	28.7631
Pongo abelii	26.9374	37.4457	56.39	21.35	21.85	30.395	18.38	33.945	21.3	14.98	21.1894
Pongo pygmaeus	32.468	42.2161	67.46	22.34	23.49	34.66	21.2449	44.49	17.7	15.58	32.3763
Pongo pygmaeus	.	39.9059	66.44	22.91	22.79	34.93	19.7253	45.57	18.1	15.175	25.9013
Pongo pygmaeus	39.0269	49.8951	77	29.38	26.94	40.46	23.9137	49.78	24.85	18.125	32.2127
Pongo pygmaeus	26.5737	36.7699	56.01	19.89	20.71	29.19	17.8502	39.54	16.8	12.825	23.1508
Pongo pygmaeus	27.9679	38.1525	55.07	20.36	20.52	31.9	18.2512	40.33	18.4	14.165	25.4806
Pongo pygmaeus	30.0295	39.7275	64.76	23.76	19.97	30.77	22.6777	41.02	19.5	14.295	32.1571
Pongo pygmaeus	33.9584	46.0236	69.16	21.56	23.89	37	22.9317	41.8	21.15	15.84	26.5176
Pongo pygmaeus	27.4102	38.2991	56.27	18.94	20.79	30.75	20.2862	32.95	17.83	14.5	27.3035
Pongo pygmaeus	27.7361	38.8891	59.9	18.86	22.02	33.92	20.8984	37.9	19.5	13.835	25.1713
Pongo pygmaeus	27.037	35.595	59.45	18.87	19.44	29.72	17.5125	34.88	16.07	12.85	24.9864
Pongo pygmaeus	32.2707	46.0908	73.62	26.93	24.83	37.66	22.8045	44.33	22.54	16.29	30.3003
Pongo pygmaeus	28.8427	41.7257	.	.	.	33.75	.	38.67	18.62	14.26	30.6676
Pongo pygmaeus	26.1013	38.1499	.	.	.	31.9	.	37.26	17.94	14.64	22.4398
Pongo pygmaeus	33.5946	45.6645	71.9	23.6	26.4	37.3	23.7582	43.1	22.2	17.05	29.6125
Pongo pygmaeus	28.5236	39.5962	58.85	19.56	26.04	21.9	18.9655	37.23	18.18	14.66	27.8592
Pongo pygmaeus	28.5231	37.2631	59.01	18.77	20.06	31.35	17.4312	37.49	17.97	14.52	24.6741
Pongo pygmaeus	30.4408	40.7922	63.28	21.52	22.34	33.3	21.347	39.7	16.14	15.48	31.5532
Pongo pygmaeus	24.0587	34.0669	53.92	17.08	19.53	29.13	17.7319	34.17	15.4	12.345	21.4183
Pongo pygmaeus	26.089	35.859	61.69	21.97	21.53	30.92	20.851	35.74	17.7	13.655	26.9255
Pongo pygmaeus	27.6872	37.9556	58.2	18.55	20.14	31.32	18.9338	35.77	16.25	14.265	26.2235
Pongo pygmaeus	23.4883	34.1239	57.62	18.8	20.02	29.14	18.4151	32.93	12.2	13.66	20.4839
Pongo pygmaeus	32.8865	45.889	77.07	29.59	26.78	40.47	26.844	45.07	19.86	17.485	32.6296
Pongo pygmaeus	27.1278	36.9179	60.71	20.45	20.74	30.57	21.0133	35.82	15.64	14.07	.
Pongo pygmaeus	34.271	44.6811	76.64	30.53	28.36	37.64	24.6717	44.45	20.93	18.18	35.2868
Pongo pygmaeus	35.3667	47.3974	77.2	25.3	28.6	40.2	26.659	45.4	19.2	16.95	35.2693
Pongo pygmaeus	28.9121	37.4453	63.62	21.97	23.13	31.75	20.9449	35.94	15.23	15.66	30.0438
Pongo pygmaeus	26.5882	35.5337	64.38	21.95	20.95	30.46	19.2338	34.85	18.06	15.965	24.809
Pongo pygmaeus	31.3974	45.294	70.24	25.89	27.14	38.06	22.8356	44.95	18.98	17.115	32.9747
Pongo pygmaeus	26.1278	36.2458	60.4	20.8	19.7	30.2	19.2159	34.6	14.5	13.6	25.6125
Pongo pygmaeus	25.0998	34.6852	.	.	.	30.4	.	35.4	.	13.805	23.5807
Pongo pygmaeus	24.6678	34.17	55.65	20.32	20.53	27.84	17.765	32.42	.	.	26.8892
Pongo pygmaeus	33.5899	46.999	76.7	27	25.5	39	23.4672	42.7	23	16.85	32.3105
Pongo pygmaeus	31.1265	43.95	65.3	21.4	22.7	35	25.1436	39.9	17.9	14.25	.
Pongo pygmaeus	26.8503	37.9088	.	.	.	30.83	.	34.32	.	.	.
Pongo pygmaeus	28.3889	33.1395	60.04	20.7	18.61	29.22	17.6676	37.26	.	.	.
Pongo pygmaeus	36.4739	44.1548	74.22	25.66	27.08	35.73	23.9849	43.46	.	18.44	32.7983
Pongo pygmaeus mori	32.5011	48.6883	67.24	24.81	25.55	37.07	23.0711	47.15	20.6	15.965	33.3131
Symphalangus syndactlus	13.9273	19.5023	29.72	11.67	12.43	18.39	11.2032	23.36	9.2	7.77	18.3259
Symphalangus syndactlus	16.8163	22.6418	32.74	14.46	14.13	20.07	12.7599	25.6	9.5	8.56	17.8262
Symphalangus syndactlus	14.9805	21.45	31.87	12.56	14.45	19.92	13.3637	26.72	9	.	18.7242
Symphalangus syndactlus	15.0063	18.7088	32.99	9.98	12.11	17.15	11.8889	23.72	8.3	8.03	15.1601
Symphalangus syndactlus	16.8972	24.831	36.5	15.2	15.88	23.39	14.9211	30.31	10.1	9.845	20.3362
Symphalangus syndactlus	14.9964	21.3393	31.11	12.04	13.65	17.77	12.315	23.17	.	.	16.5028
Symphalangus syndactlus	18.0998	21.4824	35.38	13.95	15.13	19.56	12.8049	24.65	8.1	7.615	17.1018
Symphalangus syndactylus	13.5429	20.4855	29.3	12.87	13.78	17.99	11.8996	22.22	7.75	7.37	15.1176
Symphalangus syndactylus	14.0062	21.9026	30.38	12.87	15.44	18.98	12.1545	21.4	8.04	7.145	16.2978
Symphalangus syndactylus	12.6721	20.8382	30.75	11.97	14.3	19.04	11.8538	23.12	.	.	16.9
Symphalangus syndactylus	14.0098	22.4724	32.22	11.44	15.18	19.67	12.8696	25.18	.	.	17.4207
Symphalangus syndactylus	15.5914	22.4063	34.94	11.24	16.1	20.43	14.0536	22.03	9.06	7.44	.
Symphalangus syndactylus	16.3866	22.433	33.82	13.16	15.56	19.65	13.9031	22.09	8.07	7.35	17.8017
Symphalangus syndactylus	13.9049	24.226	32.87	12.37	16.25	22.24	13.8547	25.86	8.37	.	18.1069
